# Supplementary material for: Comparison of Omega-3 Eicosapentaenoic Acid Versus Docosahexaenoic Acid-Rich Fish Oil Supplementation on Plasma Lipids and Lipoproteins in Normolipidemic Adults
Source: MDPI journal article supplement (doi:10.3390/nu12030749), 2020-03-12

## Supplemental Materials

**Supplemental Table 1 (Table S1).** the list of inclusion and exclusion criteria

| Recruitment criteria |                                                                                                                                                                                                                                                                                                                                                                                                                                                                                                                                                                                                                                                                                                                                                                                                                                                                                                                                                                                                                                                                                                                                                                                                                                                                                                                                                                                                                                                                                                                                                                                                                                                                                                                                                                                                                                                                                                                                                                                                                                                                                                                                                                                                                                                                                     |
|----------------------|-------------------------------------------------------------------------------------------------------------------------------------------------------------------------------------------------------------------------------------------------------------------------------------------------------------------------------------------------------------------------------------------------------------------------------------------------------------------------------------------------------------------------------------------------------------------------------------------------------------------------------------------------------------------------------------------------------------------------------------------------------------------------------------------------------------------------------------------------------------------------------------------------------------------------------------------------------------------------------------------------------------------------------------------------------------------------------------------------------------------------------------------------------------------------------------------------------------------------------------------------------------------------------------------------------------------------------------------------------------------------------------------------------------------------------------------------------------------------------------------------------------------------------------------------------------------------------------------------------------------------------------------------------------------------------------------------------------------------------------------------------------------------------------------------------------------------------------------------------------------------------------------------------------------------------------------------------------------------------------------------------------------------------------------------------------------------------------------------------------------------------------------------------------------------------------------------------------------------------------------------------------------------------------|
| Inclusion            | <ul style="list-style-type: none"> <li>• Male and female participants 18 years of age or above.</li> <li>• Subject must be healthy, with no known history of cardiovascular disease.</li> <li>• Pre-menopausal or women of childbearing potential must be non-lactating and using an effective form of birth control during the course of the study.</li> <li>• Subject understands protocol and provides written, informed consent in addition to a willingness to comply with specified follow-up evaluations.</li> </ul>                                                                                                                                                                                                                                                                                                                                                                                                                                                                                                                                                                                                                                                                                                                                                                                                                                                                                                                                                                                                                                                                                                                                                                                                                                                                                                                                                                                                                                                                                                                                                                                                                                                                                                                                                         |
| Exclusion            | <ul style="list-style-type: none"> <li>• Pregnancy, planned pregnancy (within the study period) or women currently breastfeeding.</li> <li>• Subjects with weight changes greater than 20% over the past 3 months.</li> <li>• Subjects planning a significant change in diet or exercise levels.</li> <li>• Subjects already consuming more than 1.5 g per day of EPA/DHA in any form.</li> <li>• Known sensitivity or allergy to fish, shellfish or omega-3 fatty acids supplements</li> <li>• Subjects with known bleeding disorders (for example, Hemophilia)</li> <li>• Subjects previously diagnosed with atrial fibrillation</li> <li>• Subjects with clinically diagnosed hepatic disease (including but not limited to auto immune disease, hepatitis and cirrhosis)</li> <li>• Subjects with chronic diarrhea, gastric bypass or lap-band procedures, ostomies, bowel motility problems, or other conditions that could affect intestinal fat absorption</li> <li>• Subjects with any acute and life-threatening condition, such as prior sudden cardiac arrest, acute myocardial infarction (last six months), stroke, embolism</li> <li>• Liver enzymes (AST or ALT) levels above 3x upper limit of normal</li> <li>• Subjects with a TSH greater than 1.5xULN or clinical evidence of hypo or hyperthyroidism</li> <li>• Subjects taking supplements or medications that affect lipoproteins for at least the past 8 weeks, such as fish oil supplements, bile-acid sequestrants, plant sterol supplements, fibrates, statins or Niacin.</li> <li>• Subjects with hemoglobin &lt;10 g/dL</li> <li>• Subject with platelet counts &lt;60x10<sup>3</sup>/microliter</li> <li>• Subjects with uncontrolled hypertension (resting blood pressure &gt; 160 mmHg systolic and /or &gt; 100 mm Hg diastolic)</li> <li>• Subject with uncontrolled diabetes (HbA1c ≥10)</li> <li>• Subjects who consume excessive alcohol</li> <li>• Subject participating in other clinical studies and/or receiving other investigational drug products prior to randomization</li> <li>• Subject taking PCSK9 inhibitors within 8 weeks prior to enrollment</li> <li>• Subjects being treated with tamoxifen, estrogens, or progestins that have not been stable for &gt;4 weeks.</li> </ul> |

- 
- Subjects initiating new medications or patients on multiple medications may also be excluded according to investigator discretion
  - Anticipated surgery during the study period
  - Blood donation in the last 2 weeks or planned blood donation during the study
  - Subjects requiring regular transfusions for any reason
  - Subjects may also be excluded for any reason that may compromise their safety or the accuracy of research data.
-

## Supplemental Fig. 1 (Figure S1)

Protein-protein interactome map and top 10 enriched GO terms of HDL-related APOM (A), AFM (B), and GSN (C) significantly altered by EPA-rich fish oil compared with DHA-rich fish oil supplementation based on STRING database (<http://string-db.org/>) with moderate confidence (0.40). The HDL fractions were isolated by fast protein liquid chromatography (FPLC) from a subgroup of random 10 subjects. GO: gene ontology; FDR: false discovery rate.

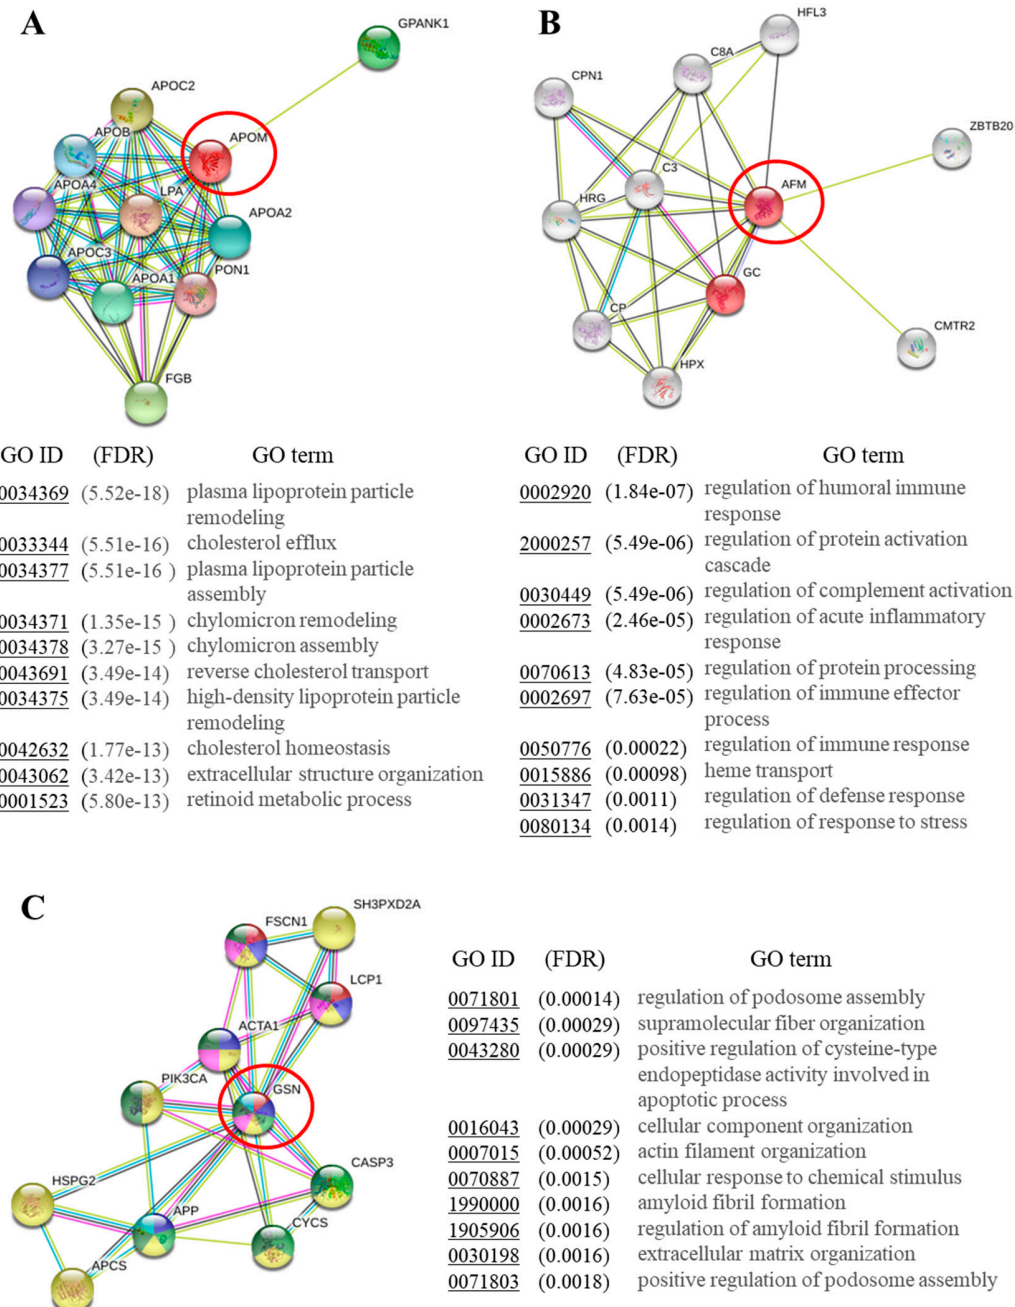

Supplement: s1 [file s1]
